# Supplementary material
Source: Springer Nature journal article supplement (https://www.springermedizin.de/resource/supplementary/12911_2010_388_MOESM5_ESM.pdf/9525628)

Overall survival

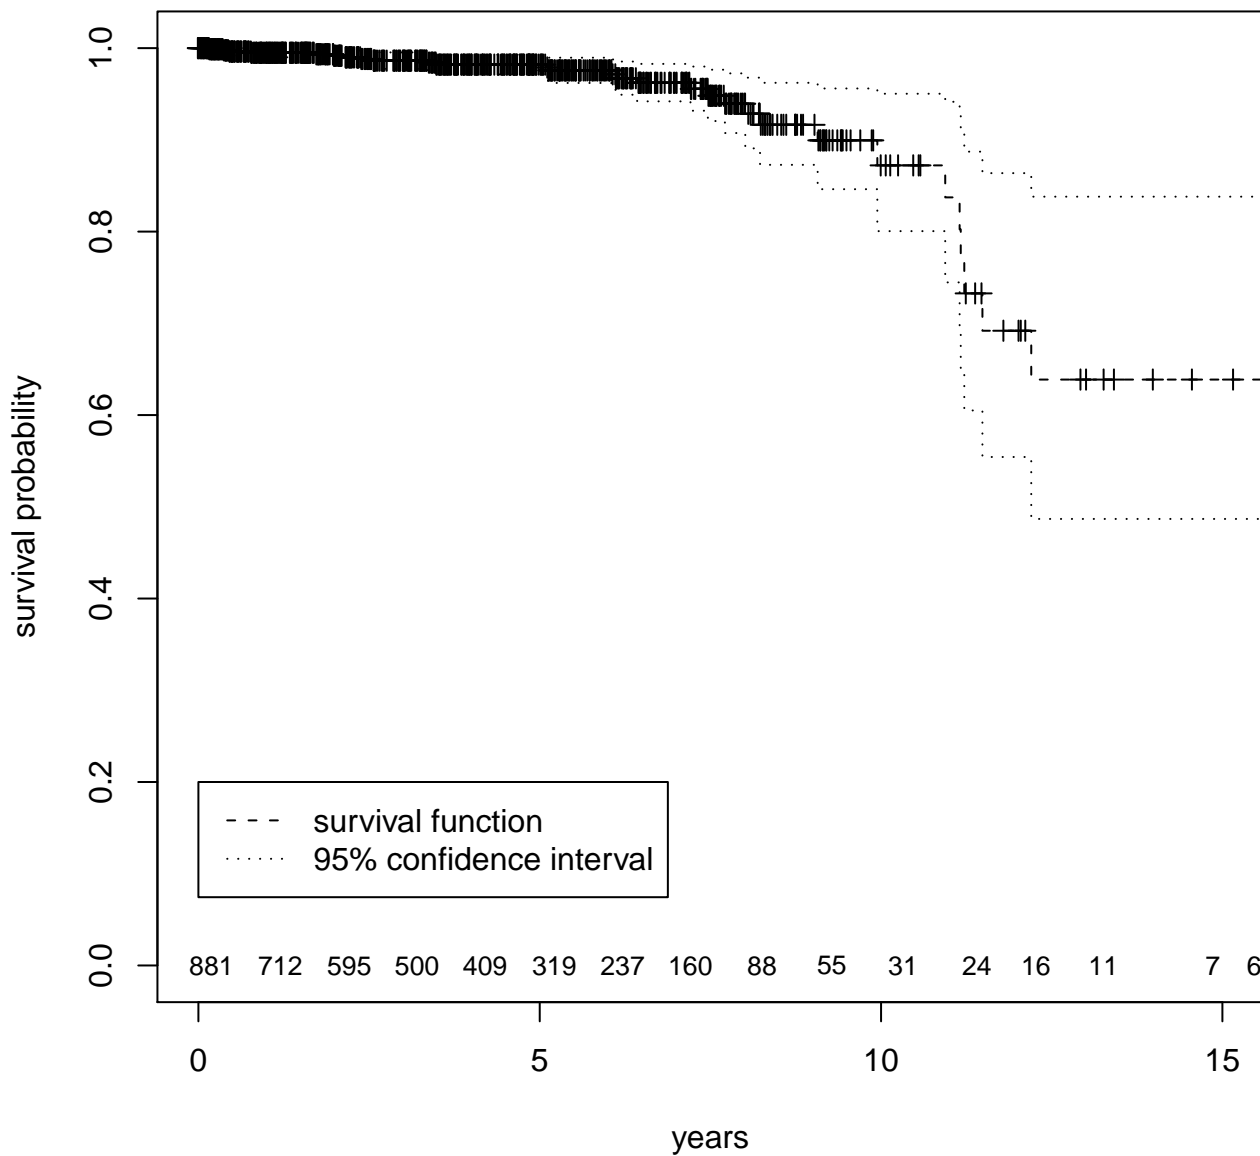

Event-free survival

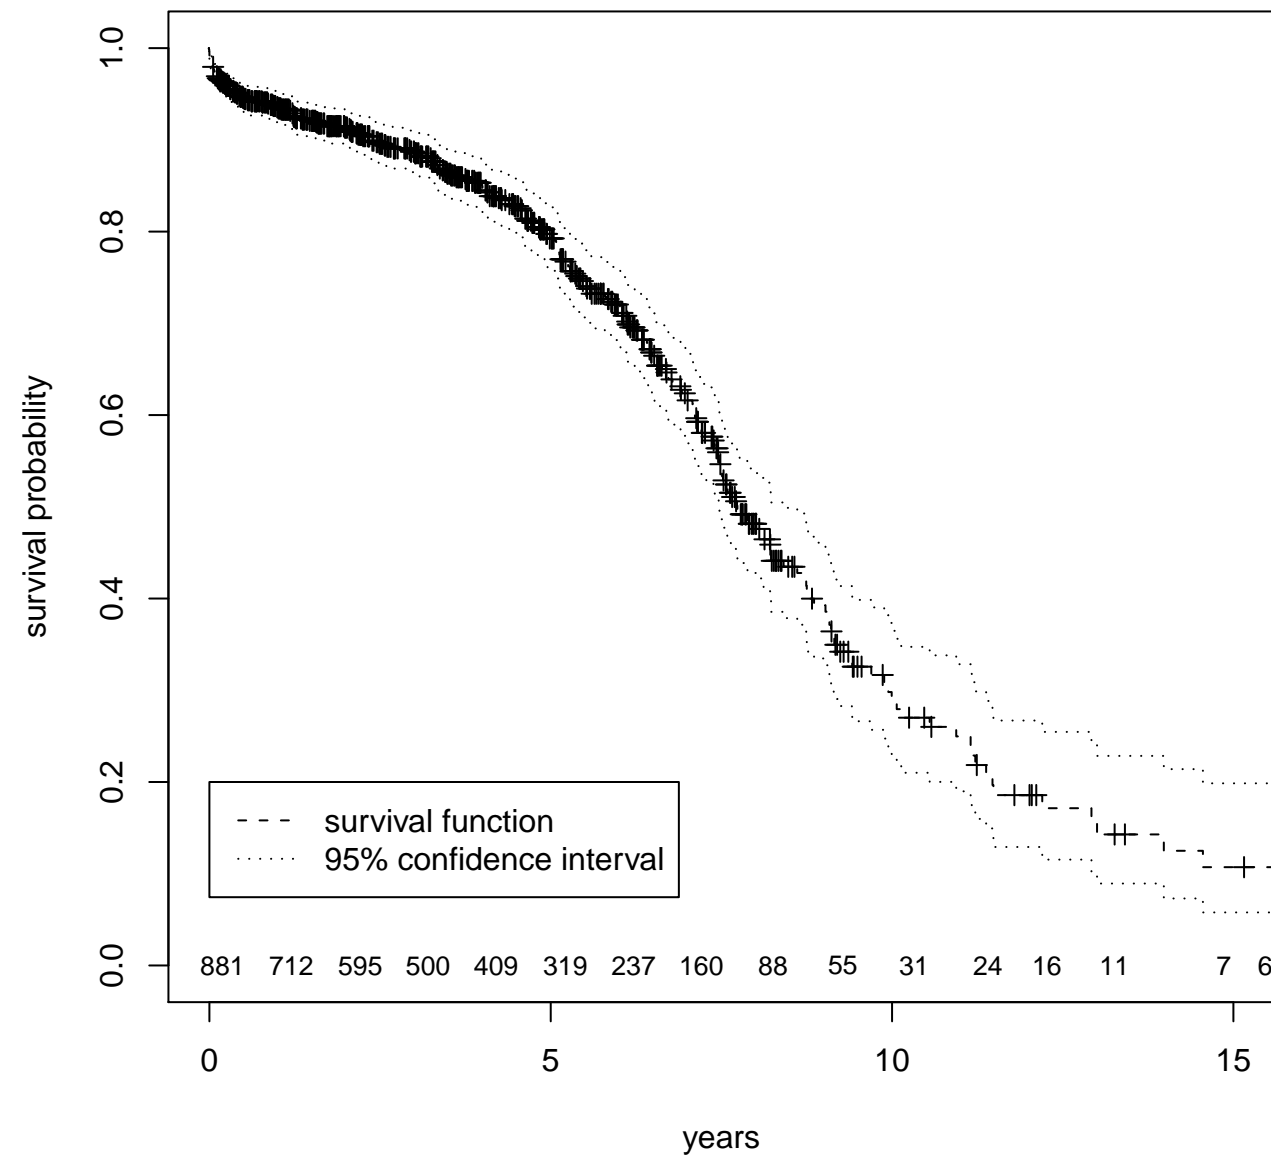

Supplement: MOESM5 [file 9525628]
